# Supplementary material for: Molecular and Functional Analysis of Sunitinib-Resistance Induction in Human Renal Cell Carcinoma Cells
Source: MDPI journal article supplement (doi:10.3390/ijms22126467), 2021-06-16
Supplement: s1 [file s1]

## Supplementary Materials

# Molecular and Functional Analysis of Sunitinib-Resistance Induction in Human Renal Cell Carcinoma Cells

Magdalena Rausch <sup>1,2,3</sup>, Adriano Rutz <sup>1,2</sup>, Pierre-Marie Allard <sup>1,2</sup>, Céline Delucinge-Vivier <sup>4</sup>, Mylène Docquier <sup>4,5</sup>, Olivier Dormond <sup>6</sup>, Jean-Luc Wolfender <sup>1,2</sup>, Patrycja Nowak-Sliwinska <sup>1,2,3,\*</sup>

<sup>1</sup> School of Pharmaceutical Sciences, University of Geneva, CMU-Rue Michel-Servet 1, CH-1211 Geneva 4, Switzerland; Magdalena.Rausch@unige.ch (M.R.); Adriano.Rutz@unige.ch (A.R.); pierre-marie.allard@unige.ch (P.-M.A.); jean-luc.wolfender@unige.ch (J.-L.W.)

<sup>2</sup> Institute of Pharmaceutical Sciences of Western Switzerland, University of Geneva, CMU-Rue Michel-Servet 1, CH-1211 Geneva 4, Switzerland

<sup>3</sup> Translational Research Center in Oncohaematology, 1205 Geneva, Switzerland

<sup>4</sup> iGE3 Genomics Platform, University of Geneva, Geneva, Switzerland; Celine.Delucinge@unige.ch (C.D.-V.); Mylene.Docquier@unige.ch (M.D.)

<sup>5</sup> Department of Genetics and Evolution, University of Geneva, 1205 Geneva, Switzerland

<sup>6</sup> Department of Visceral Surgery, Lausanne University Hospital and University of Lausanne, 1015 Lausanne, Switzerland; olivier.dormond@chuv.ch

\* Correspondence: Patrycja.Nowak-Sliwinska@unige.ch; Tel.: +41-22-379-3352

## Supplementary Methods

### Cells

Human immortalized macrovascular endothelial cells (ECRF24) and human fibroblast NHDF $\alpha$  cells were kindly provided by Angiogenesis Laboratory, UMC Amsterdam and Pharmacognosy Group UNIGE Geneva, respectively. ECRF24 cells were maintained in a 50:50 mixture of DMEM and RPMI in a flask pre-coated with 0.2% gelatin (Sigma Aldrich, Buchs, Switzerland, G1393-100ML). All media were supplemented with 10% fetal bovine serum (Biowest, Nuaillé, France, S1810-500) and 1% penicillin/streptomycin (Bioconcept, Basel, Switzerland, 4-01F00-H). NHDF $\alpha$  cells were cultured in a specified culture medium for fibroblasts including a supplement kit (Vitaris, Baar, Switzerland, C-23110-PRO).

### Therapeutically Guided Multidrug Optimization

The optimized drug combination consisting of AZD4547, osimertinib, AZD8055, and pictilisib was established to target selectively Caki-1-SR (clone 1) cells using the phenotypic technique described previously [1]. Briefly, analyzing the inhibition of the cell metabolic activity was used to determine the efficacy of each drug combination RCC and non-cancerous cell lines. The drug combination was defined through *in vitro* and *in silico* validation applying the second-order step-wise linear regression models described, as previously described [2]. Drugs were further selected after three sequential search rounds and interpreting the treatment efficacy and its statistical measures, which define the accuracy and reliability of the regression models for each iteration, with an ANOVA lack of fit test confirming the selection of a relevant model structure. Finally, dose-optimization was performed for the cell-type-specific four-drug combination.

## Supplementary Figures

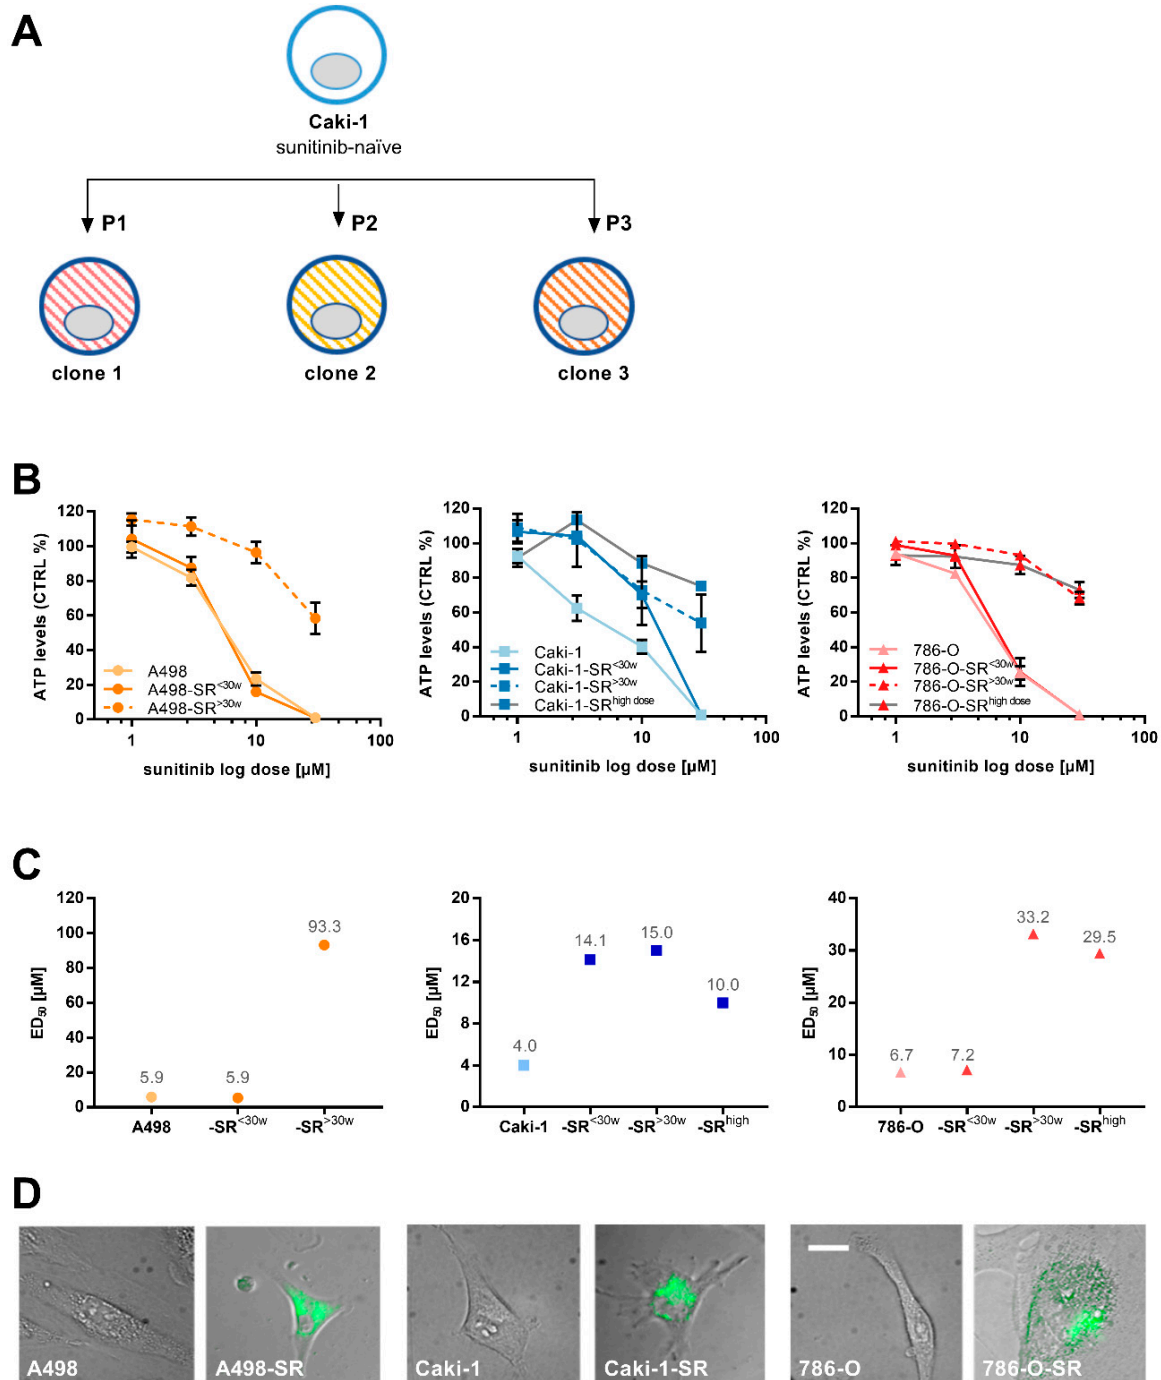

**Supplementary Figure S1.** Phenotypic analysis of sunitinib-naïve and sunitinib-resistant ccRCC cells. **A.** Schematic representation of the induction and maintenance of resistance to sunitinib following three experimental protocols (P1-P3) to obtain three different clones. P1 = increasing doses of sunitinib (1-30  $\mu\text{M}$ ); P2 = continued treatment with 1  $\mu\text{M}$  of sunitinib; P3 = single treatment with 10  $\mu\text{M}$  of sunitinib. **B.** Growth curves of human ccRCC cell lines A498, Caki-1 and 786-O in response to increasing doses of sunitinib measured as the ATP levels in the cells. Growth curves are presented in comparison to the equivalent cell lines chronically treated with 1  $\mu\text{M}$  sunitinib for less than 30 weeks (30w), over 30 weeks, or once - with a high dose of 10  $\mu\text{M}$  sunitinib. Error bars represent the SD. **C.** Calculation of the ED<sub>50</sub> for each condition and each cell line using a non-linear fit of log(inhibitor) *versus* response (four-parameter variable slope). **D.** Representative bright-field images of sunitinib-naïve and -resistant ccRCC cells demonstrating the accumulation of sunitinib (green) in the lysosomes. Scale bar = 10  $\mu\text{m}$ .

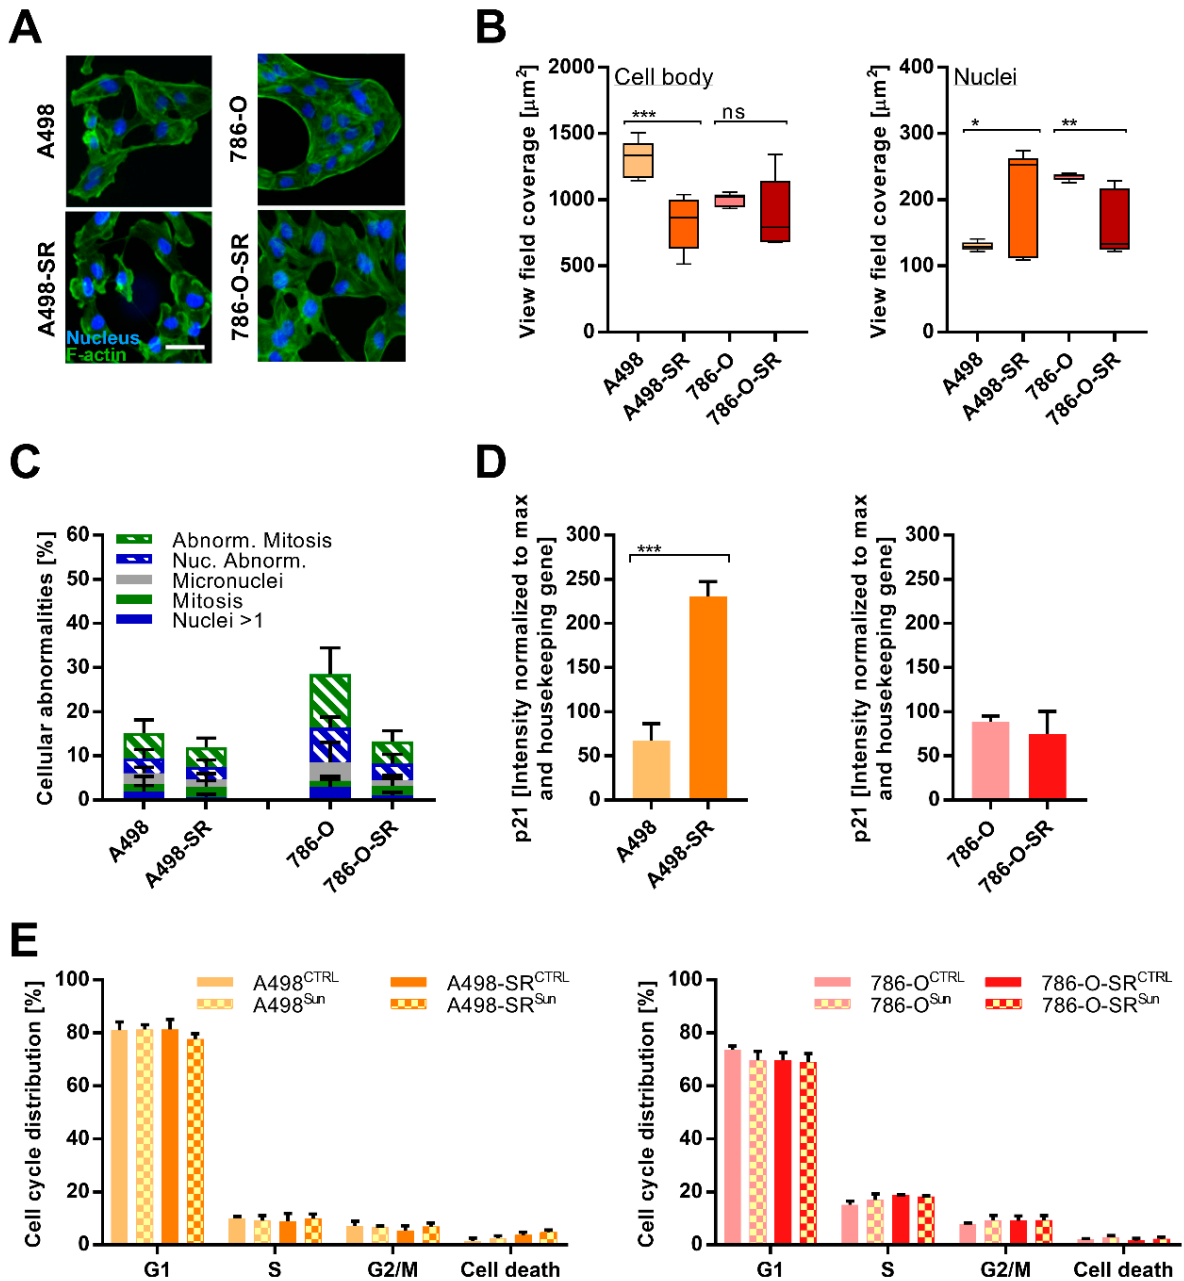

**Supplementary Figure S2.** Variance between sunitinib-naïve and sunitinib-resistant ccRCC cells after 30 weeks of chronic treatment. **A.** Fluorescent images of A498(-SR) and 786-O(-SR) cells showing the cell body (F-actin; green) and the nucleus (Dapi; blue). Scale bar = 20  $\mu\text{m}$ . **B.** The size of the cell body (left graph) and the nucleus (right graph) of A498(-SR) and 786-O(-SR) cells presented as the area covered in the view field of  $n = 12$  independent images. **C.** Cellular abnormalities measured in A498(-SR) and 786-O(-SR) cells. **D.** The expression of p21 in A498(-SR) (left graph) and 786-O(-SR) cells (right graph). The protein levels have been detected through western blot and quantified normalizing the intensity signal to the maximal intensity of protein detected as well as the house keeping gene 1. **E.** Cell cycle distribution of A498(-SR) (left graph) and 786-O(-SR) (right graph) cells in absence (CTRL) and presence of 1  $\mu\text{M}$  sunitinib (Sun). Cells were localized in the mitotic phases of G1, S, and G2/M. A small proportion (< 5%) was found to undergo cell death. Error bars represent the SD. Significance was calculated using a student's t-test.  $p^* < 0.05$ ,  $p^{**} < 0.01$ ,  $p^{***} < 0.001$ .

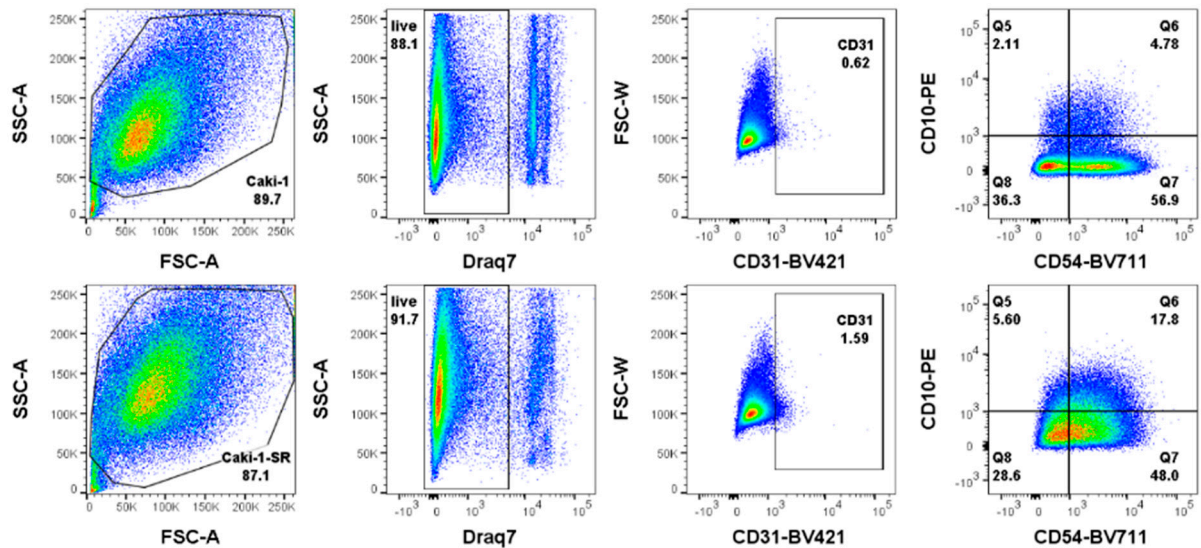

**Supplementary Figure S3.** Flow cytometry analysis of Caki-1 and Caki-1-SR cells characterizing the expression of distinct cell surface proteins. Caki-1 (top) and Caki-1-SR cells (bottom) were analyzed for their size and granularity through the forward and sideward scatter signal (FSC/ SSC). The viability of the cells was measured through viability staining with Draq7. Focusing on the viable population (live) the surface protein expression of CD31 (platelet endothelial cell adhesion molecule, PECAM-1). Zooming into the CD31 positive population, cells were characterized for the expression of CD10 (cell membrane metalloproteinase) and CD54 (intercellular adhesion molecule 1, ICAM-1). Q5: CD10+CD54- cells; Q6: CD10+CD54+ cells; Q7: CD10-CD54+ cells; Q8: CD10-CD54- cells.

**A**

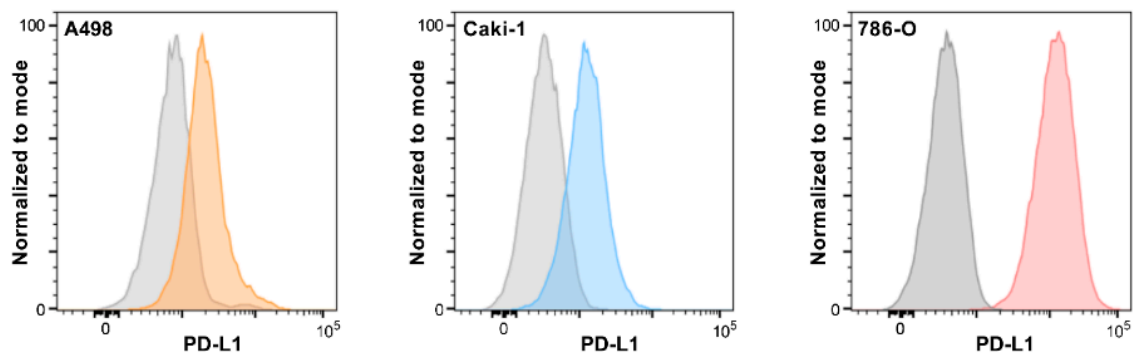

**B**

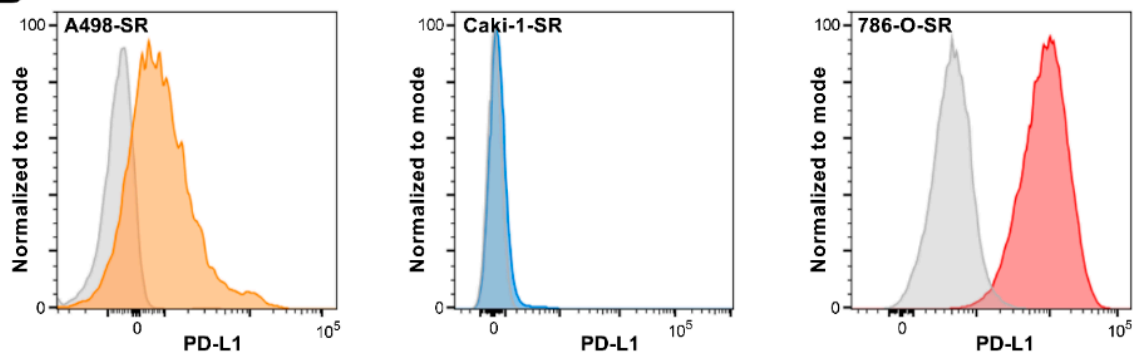

**Supplementary Figure S4.** PD-L1 expression of sunitinib-naïve and sunitinib-resistant ccRCC cell lines. Histograms showing the expression of PD-L1 measured through flow cytometry analysis on the surface of sunitinib naïve (A) and resistant (B) ccRCC cell lines. The expression of PD-L1 is demonstrated as the fluorescence signal intensity (colored peaks) in comparison to unstained cells (gray peak).

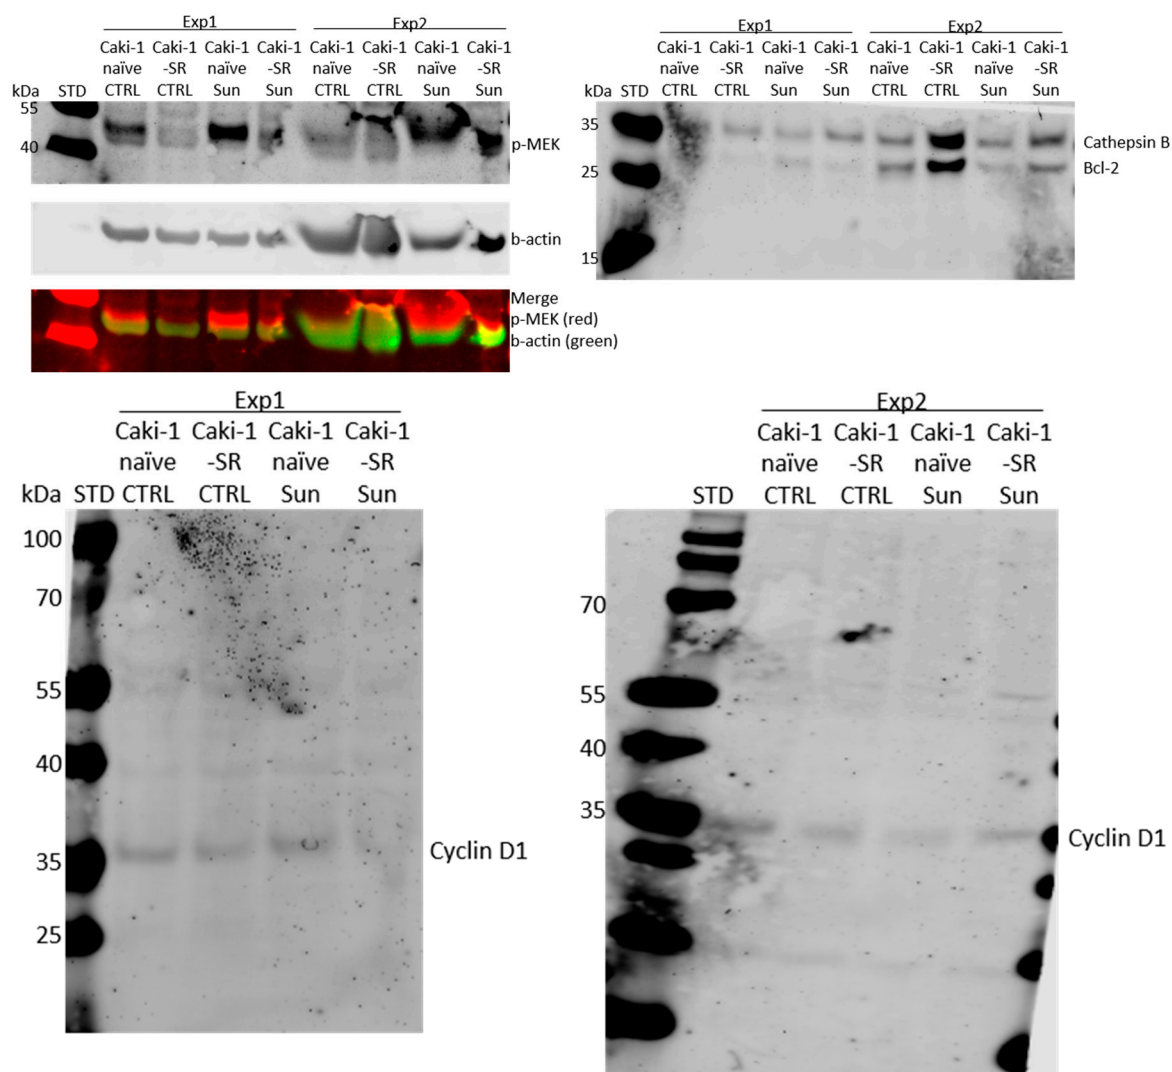

**Supplementary Figure S5.** Full blots of protein expression in sunitinib-naïve and sunitinib-resistant ccRCC cell lines. Protein expression analysis in Caki-1 and Caki-1-SR cells untreated (CTRL) or treated for 72 hours with 1  $\mu$ M sunitinib (Sun). Through western blot experiments the protein level of phosphorylated (p-) mitogen activated kinase kinase (MEK; 45 kDa), cathepsin B (44 kDa), Bcl-2 (26 kDa), cyclin D1 (36 kDa) and the housekeeping gene  $\beta$ -actin (45 kDa). The original blots show the comparison of 2 independent experiments (Exp1 and Exp2, N = 2).

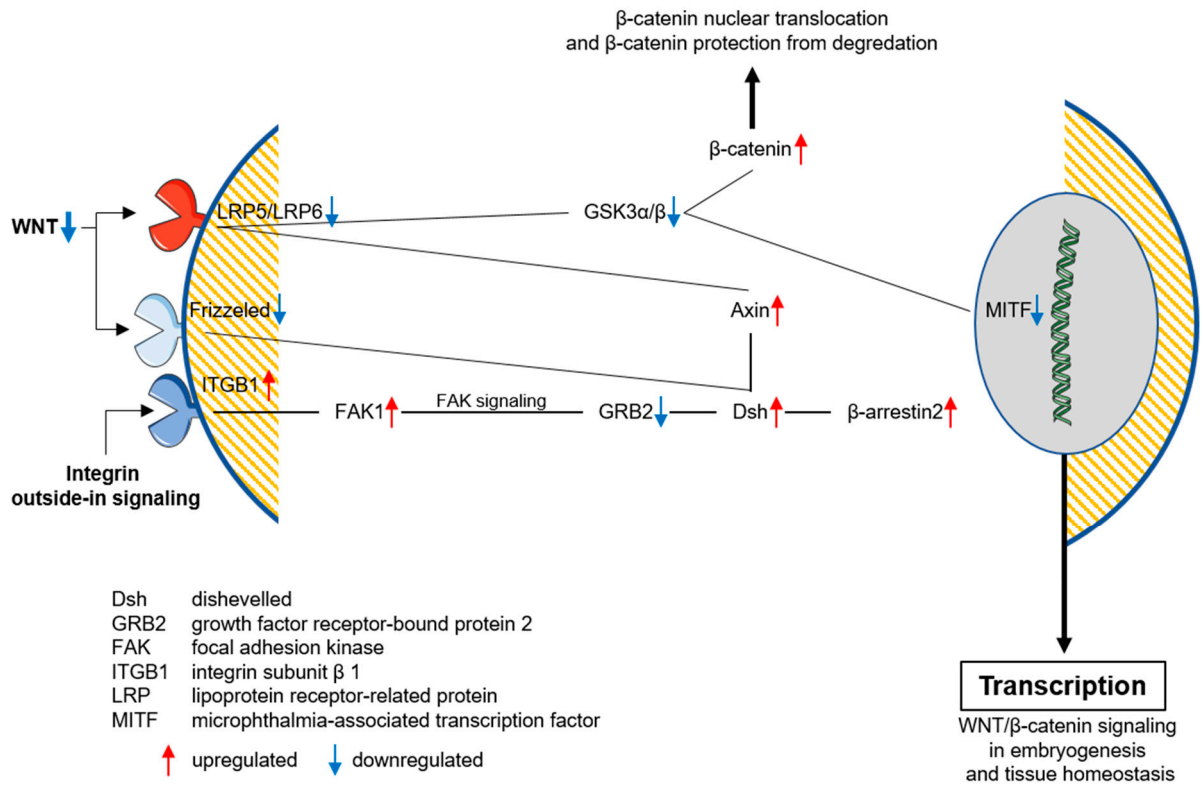

**Supplementary Figure S6.** Pathway analysis highlighting the difference in activation of the WNT/  $\beta$ -catenin pathway comparing Caki-1 and Caki-1-SR cells. Induced through integrin outside-in signaling, the MetaCore™ pathway analysis revealed a strong downregulation of WNT and the transcription factor  $\beta$ -catenin, which causes a reduced signaling via the intercalated signaling pathway. This downregulation has an ultimate impact on the transcription of proteins participating in embryogenesis and tissue homeostasis. The map demonstrates the connections between the single components in the WNT/  $\beta$ -catenin signaling.



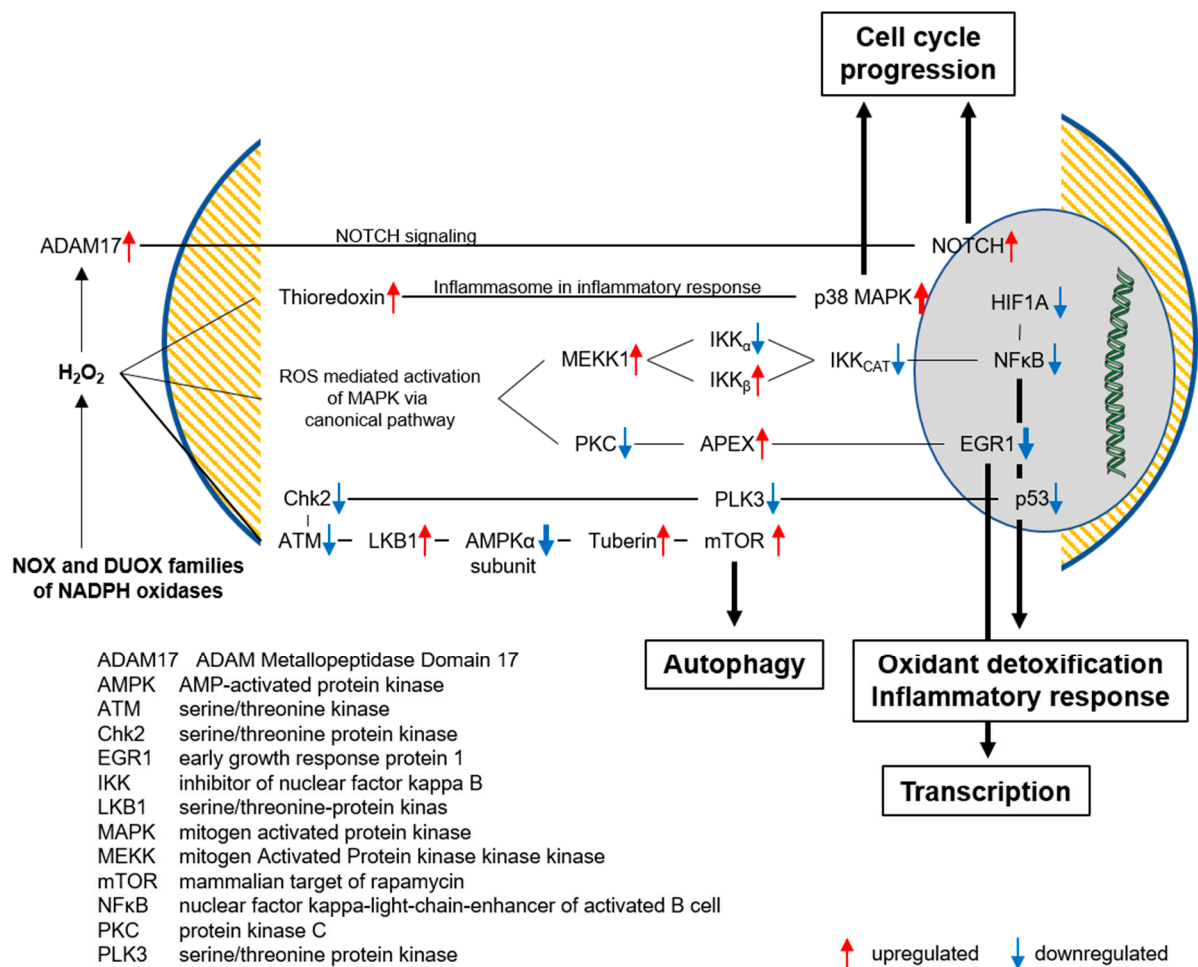

**Supplementary Figure S7.** Pathway analysis highlighting the difference in response to reactive oxygen species accumulation comparing Caki-1 and Caki-1-SR cells. Map of the molecular pathway analysis performed with MetaCore™ demonstrating the consequences of Adam17 activation regulating Notch3 processing related to altered response to reactive oxygen species. From the top to the bottom the signal transduction is presented highlighting the cellular responses that depend on the alterations within the cascade.

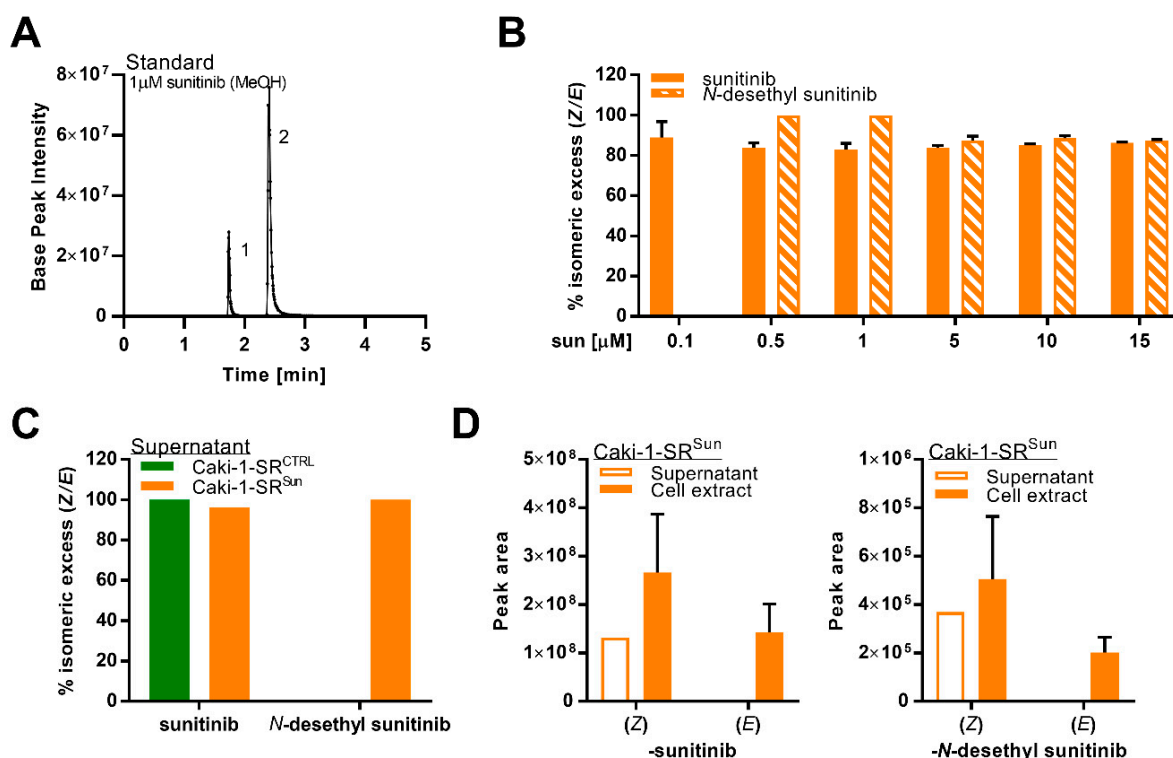

**Supplementary Figure S8.** LC-HRMS-MS analysis of sunitinib and related compounds. **A.** Extracted Ion Chromatogram (XIC at 399.22 m/z) of the sunitinib standard. The (E)- and (Z)- stereoisomers (1 and 2 respectively) are presented. **B.** Representation of the percentage of stereoisomeric excess of (Z)-form over (E)-form in the supernatant of Caki-1-SR cells treated with increasing concentrations of sunitinib. The percentage of stereoisomeric excess is independent of the treatment concentration and similar between sunitinib and its metabolite, N-desethyl sunitinib. **C.** Bar graphs demonstrating the % isomeric excess (Z/E) of the sunitinib isomers and their N-desethyl metabolites in the supernatant (left graph; N = 1) of Caki-1-SR cells cultured for 24 hours in culture medium (CTRL) or in culture medium supplemented with 1  $\mu$ M sunitinib. **D.** Bar graphs showing the peak area of sunitinib (left graph) and N-desethyl sunitinib (right graph) measured in the supernatant and the cell extract of Caki-1-SR cells treated for 24 hours with 1  $\mu$ M sunitinib. In the supernatant only the (Z)-form was detected. In the cell extract both isomer forms were detected.

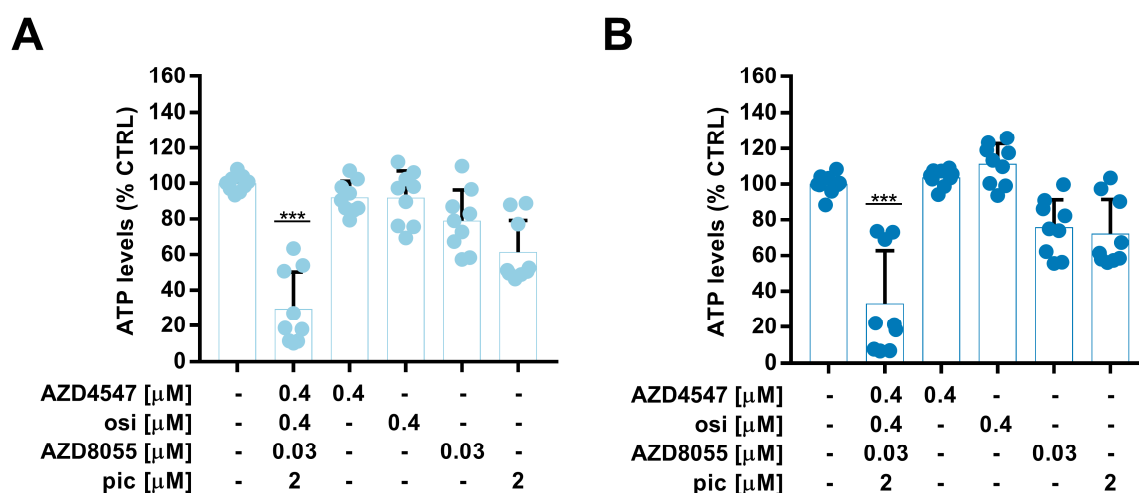

**Supplementary Figure S9.** Cell metabolic activity measurements of Caki-1 and Caki-1-SR-based heterotypic 3D co-cultures after 72 hours of treatment with the ODC. ATP levels of Caki-1-based (A) and Caki-1-SR-based (B) heterotypic 3D co-cultures measured after 72 hours of treatment with the ODC and its monotherapies. Error bars represent the SD. Statistical significance calculated using a two-way ANOVA analysis. N = 3;  $p^{***} < 0.001$ .



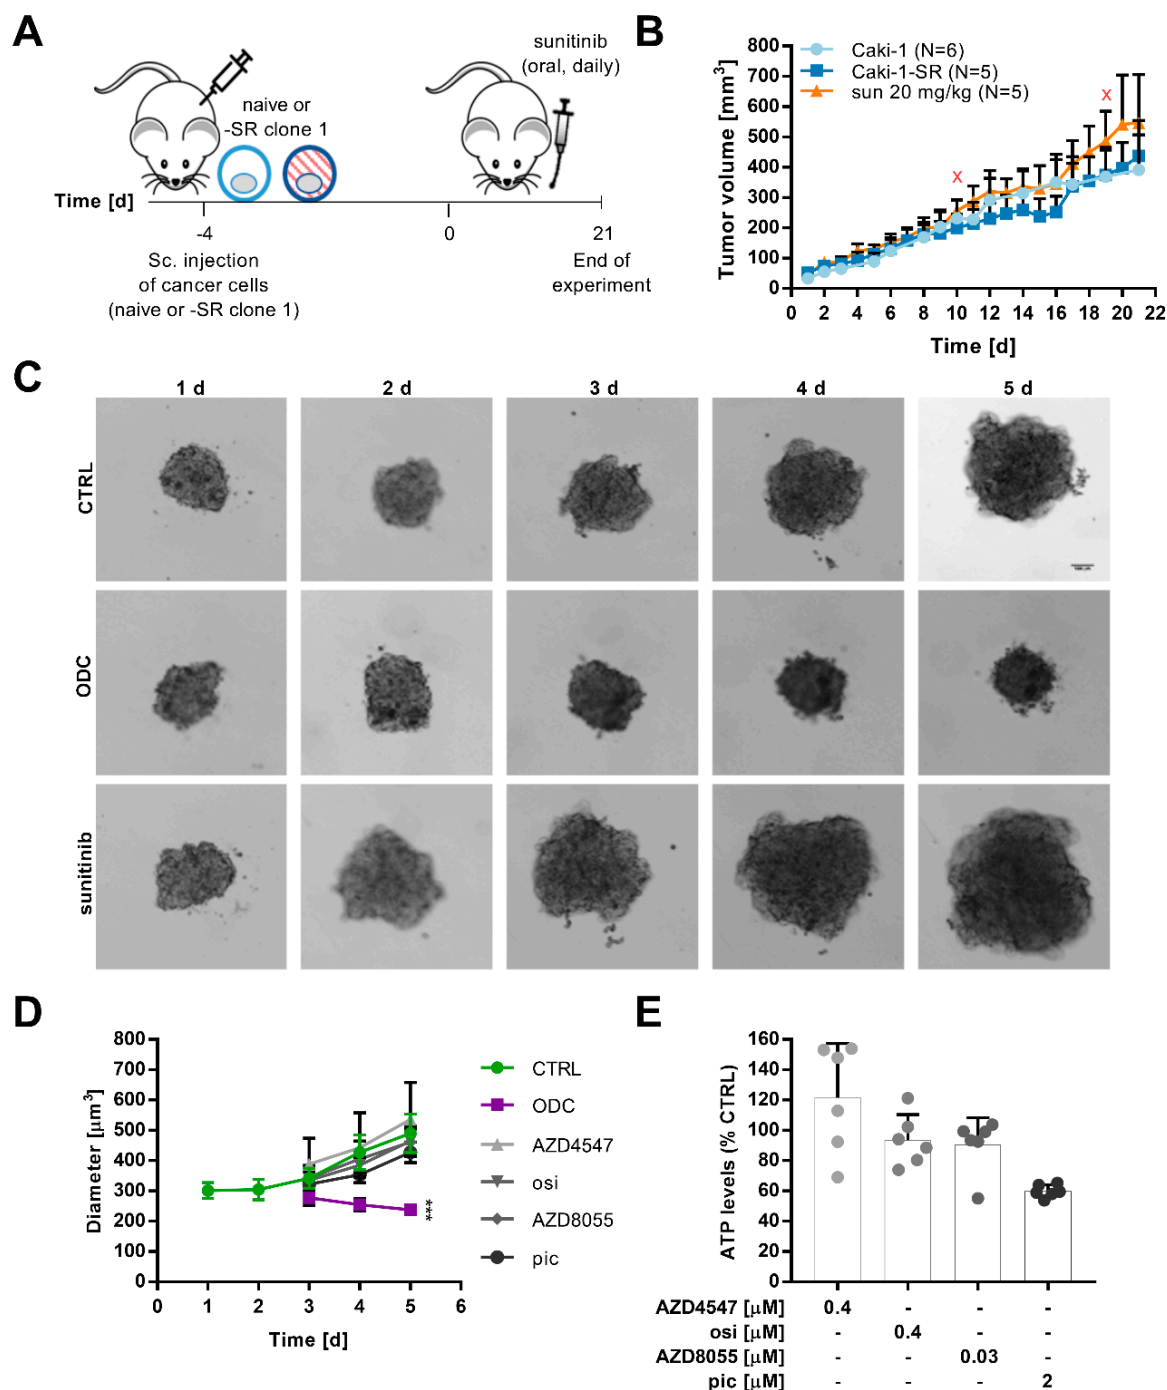

**Supplementary Figure S10.** Preparation of Caki-1-SR-based heterotypic ex vivo organoid-like cultures for the testing of a drug combination and its single drugs. A. Scheme of the experimental procedure conducting an in vivo study on the tumor growth of Caki-1 sunitinib-naïve and -resistant cells.  $1 \times 10^6$  Caki-1 or Caki-1-SR clone 1 cells were injected in the subcutaneous flank of Swiss nude mice. After a palpable tumor formed, sunitinib was given orally to N = 5 mice at a daily dose of 20 mg/kg for 21 days. B. Growth curves of Caki-1, Caki-1-SR and sunitinib treated Caki-1-SR tumors monitored for 21 days. Two mice showed severe side effects in response to sunitinib treatment and had to be sacrificed (red cross). C. Bright-field images of Caki-1-SR-based heterotypic ex vivo organoid-like cultures representing the development over 5 days (1-5d). The organoid-like cultures were cultured in culture medium (CTRL) or culture medium supplemented with either the multi-drug combination ODC or 1  $\mu$ M sunitinib. Scale bar = 100  $\mu$ m. D. Size measurements of the organoid-like cultures in response to the ODC and its monotherapies. E. Bar graphs showing the ATP levels of the Caki-1-SR-based organoid-like cultures after 72 hours of treatment with the monotherapies at the given doses. Error bars represent the SD.

## Supplementary Tables

**Supplementary Table S1.** Transcripts related to lysosomal trafficking and autophagy.

| Gene      | Full Name                                                   | Fold Change | Raw <i>p</i> -Value | <i>p</i> -Value with FDR | Regulation    |
|-----------|-------------------------------------------------------------|-------------|---------------------|--------------------------|---------------|
| ATG101    | autophagy related 101                                       | 1.11        | 0.0439              | 0.1065                   | upregulated   |
| **ATG13   | autophagy related 13                                        | 1.25        | 0.0008              | 0.0057                   | upregulated   |
| *ATG16L1  | autophagy related 16 like 1                                 | 1.20        | 0.0121              | 0.0410                   | upregulated   |
| ATG16L2   | autophagy related 16 like 2                                 | 1.32        | 0.1818              | 0.3055                   | upregulated   |
| ATG2B     | autophagy related 2B                                        | 1.00        | 0.9925              | 0.9956                   | upregulated   |
| ATG3      | autophagy related 3                                         | 1.03        | 0.5253              | 0.6548                   | upregulated   |
| ATG4A     | autophagy related 4A cysteine peptidase                     | 1.06        | 0.5300              | 0.6587                   | upregulated   |
| *ATG4B    | autophagy related 4B cysteine peptidase                     | 1.22        | 0.0107              | 0.0374                   | upregulated   |
| ATG4D     | autophagy related 4D cysteine peptidase                     | 1.18        | 0.1417              | 0.2534                   | upregulated   |
| **ATG7    | autophagy related 7                                         | 1.33        | 0.0008              | 0.0058                   | upregulated   |
| ATG9A     | autophagy related 9A                                        | 1.04        | 0.4314              | 0.5701                   | upregulated   |
| **LAMP1   | lysosomal associated membrane protein 1                     | 1.26        | 0.0005              | 0.0042                   | upregulated   |
| LAMTOR2   | late endosomal/lysosomal adaptor, MAPK and mTOR activator 2 | 1.08        | 0.3184              | 0.4609                   | upregulated   |
| *LAMTOR4  | late endosomal/lysosomal adaptor, MAPK and mTOR activator 4 | 1.40        | 0.0096              | 0.0343                   | upregulated   |
| MAP1LC3B2 | microtubule associated protein 1 light chain 3 beta 2       | 1.43        | 0.3605              | 0.5023                   | upregulated   |
| ATG10     | autophagy related 10                                        | -1.11       | 0.2569              | 0.3942                   | downregulated |
| ATG12     | autophagy related 12                                        | -1.08       | 0.2324              | 0.3667                   | downregulated |
| ATG14     | autophagy related 14                                        | -1.19       | 0.0637              | 0.1407                   | downregulated |
| ATG2A     | autophagy related 2A                                        | -1.05       | 0.4493              | 0.5866                   | downregulated |
| **ATG4C   | autophagy related 4C cysteine peptidase                     | -1.51       | 0.0005              | 0.0039                   | downregulated |
| ATG5      | autophagy related 5                                         | -1.13       | 0.0774              | 0.1627                   | downregulated |
| LAMP2     | lysosomal associated membrane protein 2                     | -1.15       | 0.0201              | 0.0597                   | downregulated |
| LAMTOR1   | late endosomal/lysosomal adaptor, MAPK and mTOR activator 1 | -1.04       | 0.4221              | 0.5615                   | downregulated |
| LAMTOR3   | late endosomal/lysosomal adaptor, MAPK and mTOR activator 3 | -1.05       | 0.4638              | 0.6000                   | downregulated |
| LAMTOR5   | late endosomal/lysosomal adaptor, MAPK and mTOR activator 5 | -1.17       | 0.0262              | 0.0730                   | downregulated |
| MAP1LC3B  | microtubule associated protein 1 light chain 3 beta         | -1.12       | 0.0551              | 0.1261                   | downregulated |

\*\* and \* = significance ( $p^* < 0.05$ ,  $p^{**} < 0.01$ ).

**Supplementary Table S2.** Significantly dysregulated transcripts related to cellular adhesion processes.

| Gene     | Full Name                                           | Fold Change | p-Value | p-Value with FDR | Regulation    |
|----------|-----------------------------------------------------|-------------|---------|------------------|---------------|
| ADGRA3   | adhesion G protein-coupled receptor A3              | 1.20        | 0.0057  | 0.0233           | upregulated   |
| ANXA8    | annexin A8                                          | 10.08       | 0.0008  | 0.0057           | upregulated   |
| ANXA11   | annexin A11                                         | 1.18        | 0.0027  | 0.0137           | upregulated   |
| ECM1     | extracellular matrix protein 1                      | 2.14        | 0.0042  | 0.0187           | upregulated   |
| GDF15    | growth differentiation factor 15                    | 4.81        | 0.0000  | 0.0001           | upregulated   |
| ILK      | integrin linked kinase                              | 1.29        | 0.0003  | 0.0027           | upregulated   |
| MFAP5    | microfibril associated protein 5                    | 2.60        | 0.0008  | 0.0058           | upregulated   |
| MMP1     | matrix metalloproteinase 1                          | 3.07        | 0.0069  | 0.0269           | upregulated   |
| MMP13    | matrix metalloproteinase 13                         | 3.03        | 0.0195  | 0.0584           | upregulated   |
| MMP15    | matrix metalloproteinase 15                         | 2.07        | 0.0031  | 0.0149           | upregulated   |
| NDNF     | neuron derived neurotrophic factor                  | 2.66        | 0.0031  | 0.0152           | upregulated   |
| PTX3     | pentraxin 3                                         | 2.31        | 0.0000  | 0.0002           | upregulated   |
| SHH      | sonic hedgehog signaling molecule                   | 4.81        | 0.0002  | 0.0020           | upregulated   |
| THBS1    | thrombospondin 1                                    | 1.58        | 0.0000  | 0.0005           | upregulated   |
| THBS4    | thrombospondin 4                                    | 1.97        | 0.0230  | 0.0663           | upregulated   |
| ABI3BP   | ABI family member 3 binding protein                 | -3.46       | 0.0107  | 0.0375           | downregulated |
| ADGRB3   | adhesion G protein-coupled receptor B3              | -1.35       | 0.0221  | 0.0644           | downregulated |
| ADGRG1   | adhesion G protein-coupled receptor G1              | -1.49       | 0.0000  | 0.0004           | downregulated |
| ADGRG6   | adhesion G protein-coupled receptor G6              | -1.31       | 0.0009  | 0.0063           | downregulated |
| ADGRL1   | adhesion G protein-coupled receptor L1              | -1.43       | 0.0002  | 0.0023           | downregulated |
| BCAM     | basal cell adhesion molecule (Lutheran blood group) | -4.05       | 0.0001  | 0.0015           | downregulated |
| BGN      | biglycan                                            | -5.15       | 0.0037  | 0.0170           | downregulated |
| CFP      | complement factor properdin                         | -2.13       | 0.0036  | 0.0167           | downregulated |
| COL11A1  | collagen type XI alpha 1 chain                      | -79.02      | 0.0000  | 0.0000           | downregulated |
| COL12A1  | collagen type XII alpha 1 chain                     | -2.12       | 0.0000  | 0.0005           | downregulated |
| COL14A1  | collagen type XIV alpha 1 chain                     | -1.83       | 0.0001  | 0.0012           | downregulated |
| COL17A1  | collagen type XVII alpha 1 chain                    | -1.40       | 0.0338  | 0.0882           | downregulated |
| COL1A1   | collagen type I alpha 1 chain                       | -3.24       | 0.0000  | 0.0000           | downregulated |
| COL24A1  | collagen type XXIV alpha 1 chain                    | -6.47       | 0.0003  | 0.0027           | downregulated |
| COL26A1  | collagen type XXVI alpha 1 chain                    | -6.53       | 0.0000  | 0.0004           | downregulated |
| COL4A1   | collagen type IV alpha 1 chain                      | -1.54       | 0.0000  | 0.0001           | downregulated |
| COL4A2   | collagen type IV alpha 2 chain                      | -1.28       | 0.0037  | 0.0170           | downregulated |
| COL4A4   | collagen type IV alpha 4 chain                      | -3.37       | 0.0005  | 0.0039           | downregulated |
| COL4A5   | collagen type IV alpha 5 chain                      | -1.50       | 0.0001  | 0.0010           | downregulated |
| COL4A6   | collagen type IV alpha 6 chain                      | -2.10       | 0.0001  | 0.0011           | downregulated |
| COL5A2   | collagen type V alpha 2 chain                       | -10.22      | 0.0000  | 0.0000           | downregulated |
| COL6A3   | collagen type VI alpha 3 chain                      | -12.47      | 0.0000  | 0.0000           | downregulated |
| COL7A1   | collagen type VII alpha 1 chain                     | -1.33       | 0.0262  | 0.0730           | downregulated |
| COL8A1   | collagen type VIII alpha 1 chain                    | -2.16       | 0.0000  | 0.0000           | downregulated |
| FLG      | filaggrin                                           | -2.12       | 0.0000  | 0.0000           | downregulated |
| FN1      | fibronectin 1                                       | -3.23       | 0.0000  | 0.0004           | downregulated |
| HAPLN1   | hyaluronan and proteoglycan link protein 1          | -2.65       | 0.0038  | 0.0173           | downregulated |
| INHBE    | inhibin subunit beta E                              | -2.35       | 0.0034  | 0.0160           | downregulated |
| L1CAM    | L1 cell adhesion molecule                           | -2.84       | 0.0000  | 0.0000           | downregulated |
| LAMA1    | laminin subunit alpha 1                             | -1.87       | 0.0009  | 0.0060           | downregulated |
| LAMA2    | laminin subunit alpha 2                             | -1.66       | 0.0129  | 0.0431           | downregulated |
| LAMA3    | laminin subunit alpha 3                             | -6.63       | 0.0000  | 0.0000           | downregulated |
| LAMA4    | laminin subunit alpha 4                             | -41.76      | 0.0000  | 0.0001           | downregulated |
| LAMB3    | laminin subunit beta 3                              | -1.77       | 0.0000  | 0.0001           | downregulated |
| LAMC2    | laminin subunit gamma 2                             | -1.72       | 0.0010  | 0.0068           | downregulated |
| MMP19    | matrix metalloproteinase 19                         | -2.60       | 0.0151  | 0.0483           | downregulated |
| SERPINA1 | serpin family A member 1                            | -2.25       | 0.0009  | 0.0062           | downregulated |
| THBS3    | thrombospondin 3                                    | -2.16       | 0.0128  | 0.0428           | downregulated |

**Supplementary Table S3.** RNA sequencing data showing the expression of VHL, c-MET, VEGF, mTOR and PDGF(R) as well as related transcripts.

| Gene   | Description                                  | Fold Change | p-Value | p-Value with FDR | Regulation    |
|--------|----------------------------------------------|-------------|---------|------------------|---------------|
| VBP1   | VHL binding protein 1                        | -1.15       | 0.1092  | 0.2096           | downregulated |
| VHL    | von Hippel-Lindau tumor suppressor           | -1.10       | 0.0958  | 0.1901           | downregulated |
| MET    | MET proto-oncogene, receptor tyrosine kinase | 1.13        | 0.0376  | 0.0953           | upregulated   |
| VEGFA  | vascular endothelial growth factor A         | -1.22       | 0.0312  | 0.0830           | downregulated |
| VEGFB  | vascular endothelial growth factor B         | 1.08        | 0.2860  | 0.4263           | upregulated   |
| VEGFC  | vascular endothelial growth factor C         | 1.14        | 0.0645  | 0.1421           | upregulated   |
| MTOR   | mechanistic target of rapamycin kinase       | 1.23        | 0.0013  | 0.0080           | upregulated   |
| PDGFA  | platelet derived growth factor subunit A     | 1.64        | 0.0012  | 0.0077           | upregulated   |
| PDGFB  | platelet derived growth factor subunit B     | 2.41        | 0.0000  | 0.0004           | upregulated   |
| PDGFC  | platelet derived growth factor C             | -1.19       | 0.0108  | 0.0376           | downregulated |
| PDGFD  | platelet derived growth factor D             | 1.31        | 0.0178  | 0.0546           | upregulated   |
| PDGFRB | platelet derived growth factor receptor beta | -2.14       | 0.0004  | 0.0035           | downregulated |
| PDGFRL | platelet derived growth factor receptor like | 4.25        | 0.0044  | 0.0192           | upregulated   |

**Supplementary Table S4.** Small molecule-based compounds used in this study.

| Compound              | Cellular Target          | Development | ODC [ $\mu$ M] |
|-----------------------|--------------------------|-------------|----------------|
| AZD4547               | FGFR1/2/3, FGFR4, VEGFR2 | Phase IIa   | 0.4            |
| AZD8055               | mTORC1/2                 | Phase I/II  | 0.03           |
| osimertinib           | EGFR                     | Approved    | 0.4            |
| Pictilisib (GDC-0941) | PI3K $\alpha/\delta$     | Phase II    | 2.0            |

**Supplementary Table S5.** Fluorophore conjugated antibodies for flow cytometry analysis.

| Marker        | Fluorochrome | Antibody Type      | Dilution | Provider      | Reference |
|---------------|--------------|--------------------|----------|---------------|-----------|
| CD10          | PE           | Mouse a-human IgG1 | 1:500    | BD Bioscience | 557143    |
| CD31          | BV421        | Mouse a-human IgG1 | 1:1000   | BD Bioscience | 564089    |
| CD54 (ICAM-1) | BV711        | Mouse a-human IgG3 | 1:1000   | BD Bioscience | 564078    |
| CD274 (PD-L1) | APC          | Mouse a-human IgG1 | 1:1000   | Biolegend     | 329708    |

**Supplementary Table S6.** Unconjugated primary antibodies for western blot analysis.

| Protein        | Molecular Weight [kDa] | Specification    | Species | Dilution | Provider      | Reference |
|----------------|------------------------|------------------|---------|----------|---------------|-----------|
| $\beta$ -actin | 45                     | clone AC-74      | Mouse   | 1:4000   | Sigma Aldrich | A2228     |
| Bcl-2          | 26                     | 124              | Mouse   | 1:4000   | CellSignaling | 15071S    |
| Cathepsin B    | 44, 27, 24             | D1C7Y            | Rabbit  | 1:4000   | CellSignaling | 31718S    |
| Cyclin D1      | 36                     | 92G2             | Rabbit  | 1:4000   | CellSignaling | 2978S     |
| phospho-MEK1/2 | 45                     | Ser217/221       | Rabbit  | 1:4000   | CellSignaling | 9121S     |
| p21            | 21                     | Waf1/Cip1 (12D1) | Rabbit  | 1:4000   | CellSignaling | 2947S     |

kDa = kilodalton; phospho- = phosphorylated.

## Supplementary References

1. Rausch, M.; Weiss, A.; Achkhanian, J.; Rotari, A.; Nowak-Sliwinska, P. Identification of low-dose multidrug combinations for sunitinib-naïve and pre-treated renal cell carcinoma. *Br. J. Cancer* **2020**, *123*, 556–567, doi:10.1038/s41416-020-0890-y.
2. Weiss, A.; Berndsen, R.H.; Ding, X.; Ho, C.M.; Dyson, P.J.; Van Den Bergh, H.; Griffioen, A.W.; Nowak-Sliwinska, P. A streamlined search technology for identification of synergistic drug combinations. *Sci Rep.* **2015**, *5*, 14508, doi:10.1038/srep14508.
